Sun et al

1 **Broad-spectrum adaptive antibiotic resistance associated with *Pseudomonas***  
2 ***aeruginosa* mucin-dependent surfing motility**

3  
4 **Evelyn Sun<sup>a</sup>, Erin E. Gill<sup>a</sup>, Reza Falsafi<sup>a</sup>, Amy Yeung<sup>a</sup>, Sijie Liu<sup>a</sup>, and Robert E.W.**  
5 **Hancock<sup>a,#</sup>**

6  
7 <sup>a</sup>Center for Microbial Diseases and Immunity Research, Department of Microbiology and  
8 Immunology, University of British Columbia, Vancouver, Canada

9  
10 Running Title: *P. aeruginosa* surfing-mediated antibiotic resistance

11  
12 # Corresponding author. Mailing address: Room 232, 2259 Lower Mall Research Station,  
13 University of British Columbia, Vancouver, British Columbia, Canada, V6T 1Z4.

14 Tel [604 822 2682](tel:6048222682), Fax [604 827 5566](tel:6048275566), E-mail: [bob@hancocklab.com](mailto:bob@hancocklab.com)

15  
16 **Abstract**

17 Surfing motility is a novel form of surface adaptation exhibited by the nosocomial pathogen,  
18 *Pseudomonas aeruginosa*, in the presence of the glycoprotein mucin that is found in high  
19 abundance at mucosal surfaces especially the lungs of cystic fibrosis and bronchiectasis patients.  
20 Here we investigated the adaptive antibiotic resistance of *P. aeruginosa* under conditions in  
21 which surfing occurs compared to cells undergoing swimming. *P. aeruginosa* surfing cells were  
22 significantly more resistant to several classes of antibiotics including aminoglycosides,  
23 carbapenems, polymyxins, and fluoroquinolones. This was confirmed by incorporation of

Sun et al

24 antibiotics into growth medium, which revealed a concentration-dependent inhibition of surfing  
25 motility that occurred at concentrations much higher than those needed to inhibit swimming. To  
26 investigate the basis of resistance, RNA-Seq was performed and revealed that surfing influenced  
27 the expression of numerous genes. Included amongst genes dysregulated under surfing  
28 conditions were multiple genes from the *Pseudomonas* resistome, which are known to affect  
29 antibiotic resistance when mutated. Screening transposon mutants in these surfing-dysregulated  
30 resistome genes revealed that several of these mutants exhibited changes in susceptibility to one  
31 or more antibiotics under surfing conditions, consistent with a contribution to the observed  
32 adaptive resistance. In particular, several mutants in resistome genes, including *armR*, *recG*,  
33 *atpB*, *clpS*, *nuoB*, and certain hypothetical genes such as PA5130, PA3576 and PA4292, showed  
34 contributions to broad-spectrum resistance under surfing conditions and could be complemented  
35 by their respective cloned genes. Therefore, we propose that surfing adaption led to extensive  
36 multidrug adaptive resistance as a result of the collective dysregulation of diverse genes.

## 37 **Introduction**

38 The rise of antibiotic resistance is a global concern. As the number of new antibiotics being  
39 discovered declines and the extensive and sometimes inappropriate use of antibiotics continues,  
40 more patients suffer and die from infections caused by antibiotic resistant bacteria (1, 2).  
41 *Pseudomonas aeruginosa* is categorized as a serious threat by the CDC and a priority 1 critical  
42 pathogen by the World Health Organization (WHO) (3–5). *P. aeruginosa* is a Gram-negative  
43 opportunistic pathogen that causes approximately 10% of all hospital-acquired infections as well  
44 as chronic infections in the lungs of individuals with cystic fibrosis (CF) (6, 7). Therefore, there  
45 is a growing need to understand the mechanisms leading to antibiotic resistance in *P. aeruginosa*.

46 *P. aeruginosa* can deploy intrinsic, acquired and adaptive resistance mechanisms (8, 9).

Sun et al

47 Intrinsic resistance refers to the bacterium's natural qualities that allow it to evade the effects of  
48 antibiotics and is not induced by stress nor the presence of antibiotics (8). Intrinsic resistance  
49 includes low outer membrane permeability that works in synergy with intrinsic levels of efflux  
50 pumps,  $\beta$ -lactamases, periplasmic enzymes, and other resistance mechanisms. Acquired  
51 resistance can be selected for by antibiotic exposure and occurs due to mutations or the  
52 acquisition of genetic elements such as plasmids, transposons, and integrons (8, 9). Adaptive  
53 resistance refers to resistance that occurs due to environmental circumstances and is thought to  
54 be largely due to transcriptional changes in genes that determine resistance/susceptibility and is  
55 reversible when environmental circumstances (e.g. exposure to stresses including antibiotics,  
56 complex adaptive growth states such as swarming or biofilm formation, etc.) are reversed (8). *P.*  
57 *aeruginosa* in the cystic fibrosis lung, especially during late stages, is thought to grow as  
58 biofilms (10). Biofilms represent a growth state in which bacteria grow as structured  
59 communities on surfaces and exhibit multidrug adaptive resistance (11).

60 Bacterial motility is a critical aspect of *P. aeruginosa* pathogenesis. Motility is needed for  
61 colonization of the host and the establishment of biofilms (12). It is also often coupled with the  
62 expression of virulence factors. *P. aeruginosa* has two known forms of polar locomotory  
63 appendages, a tail-like flagellum and hair-like type IV pilus; these contribute to a diverse set of  
64 motile phenotypes or lifestyles. The three most highly-studied forms of motility are swimming,  
65 twitching and swarming (12, 13). Swimming motility involves the use of flagellar rotation to  
66 move within aqueous environments. Twitching depends on the type IV pilus to enable movement  
67 on solid surfaces through the extension and retraction of polar pili (12, 14). These types of  
68 movements are not accompanied by major changes in gene expression. In contrast, swarming  
69 motility is a complex adaptation that involves multi-cellular coordination to enable movement on

Sun et al

70 semi-solid surfaces in the presence of a poor nitrogen source (12, 14). This surface motility form  
71 is dependent on both pili and flagella, and results in dendritic (*P. aeruginosa* strain PA14) or  
72 solar flare colonies (*P. aeruginosa* strain PA01) on 0.4-0.6% (wt/vol) agar (12). A less studied  
73 form of motility termed sliding occurs when *Pseudomonas* glide on solid surfaces independent of  
74 any appendages but dependent on the production of rhamnolipid surfactants to reduce surface  
75 tension (15). The conditions under which swarming motility occur have been proposed to reflect  
76 CF lung conditions due to the high similarities in composition (semi viscous surface, amino acids  
77 as a nitrogen source, glucose as a carbon source); however, swarming models lack a major  
78 glycoprotein known as mucin found in the CF lungs and involved in regulating mucosal viscosity  
79 (12). By incorporating mucin into an artificial CF model, a novel form of motility termed  
80 “surfing” was discovered (12).

81 Mucin is secreted from mucosal and submucosal glands in the lungs and other mucosal  
82 surfaces (12). It contains a polypeptide core with branched oligosaccharide chains. Molecular  
83 cross-linking of its structure contributes to the viscoelastic properties of mucus. When mucin is  
84 added to media that normally support swimming or swarming, accelerated surface motility  
85 termed surfing occurs. Surfing depends on intact flagella but not type IV pili (12). Surfing  
86 colonies appear relatively circular with thick white outer edges containing mostly non-flagellated  
87 cells piled on top of each other and a blue-green centre with flagellated cells (12). Unlike  
88 swarming, surfing motility does not require such strict growth conditions and can occur in  
89 nutrient-rich or minimal medium, in the presence of ammonium as a nitrogen source and at a  
90 range of viscosities/agar concentrations (ranging from 0.3% to 1.0% wt/vol). Mucin is proposed  
91 to act as a wetting agent or lubricant and, unlike swarming or sliding, surfing does not depend on  
92 rhamnolipid production (12). It was suggested that surfing is a complex adaptive form of motility

Sun et al

93 (12).

94 Here we demonstrate that surfing cells exhibited multi-drug adaptive resistance, dependent  
95 on the complex adaptive changes that accompanied this motility phenotype. Compared to  
96 swimming, surfing adaptive cells were significantly more resistant to several classes of  
97 antibiotics including aminoglycosides, polymyxins, fluoroquinolones, and carbapenems.  
98 Screening mutants of resistome genes that were found to be dysregulated under surfing  
99 conditions revealed changes in susceptibility that may account for their contribution to the  
100 observed resistance.

## 101 **Results**

### 102 *Surfing cells exhibited broad-spectrum antibiotic resistance*

103 Disk diffusion assay results (Fig 1), assessing how close surfing and swimming cells  
104 approached an antibiotic disk, revealed a significant decrease in the zone of inhibition under  
105 surfing conditions (SCFM 0.3% agar, 0.4% mucin) when compared to swimming (SCFM 0.3%  
106 agar) or to a disk diffusion lawn control/growth control (SCFM 1.5% agar). This was observed  
107 for 12 of the 17 antibiotics tested with the exceptions of 3 of the  $\beta$ -lactams and 2 macrolides.  
108 Compared to swimming bacteria (and disk diffusion assays), surfing cells exhibited significant  
109 adaptive resistance to the tested aminoglycosides, carbapenems, polymyxins, fluoroquinolones,  
110 trimethoprim, tetracycline, and chloramphenicol, with complete resistance to 3 different  
111 aminoglycosides, imipenem, clarithromycin, and the polymyxins.

### 112 *Antibiotic incorporation assays to confirm adaptive resistance*

113 To further investigate the adaptive resistance of surfing colonies, 5 selected antibiotics  
114 were incorporated into growth plates to determine how they affect the initiation and propagation  
115 of motility colonies. These antibiotic incorporation assays (Fig 2), involving norfloxacin,

Sun et al

116 polymyxin B, imipenem, tetracycline, and tobramycin, revealed a concentration-dependent  
117 inhibition of surfing motility and showed that surfing motility proceeded at antibiotic  
118 concentrations that completely inhibited swimming. For example, surfing occurred on 0.1  $\mu\text{M}$   
119 imipenem whereas swimming was completely abolished at this concentration. As the imipenem  
120 concentration increased, there was a clear reduction in the size of the surfing colony and at a  
121 concentration of 1  $\mu\text{M}$  imipenem both surfing and swimming were completely inhibited. Indeed,  
122 for all five antibiotics tested, inhibition of surfing occurred with increasing concentrations but  
123 still occurred to some extent at concentrations much higher than those inhibiting swimming.

#### 124 ***Adaptive antibiotic resistance was not due to the presence of mucin alone***

125 To show that the observed resistances were attributable to the surfing adaptation rather  
126 than the presence of mucin, we examined the effect of mucin on the broth dilution MIC of *P.*  
127 *aeruginosa* PA14 (Table 1). In liquid SCFM medium, the MIC values for most antibiotics, with  
128 and without mucin, remained fairly similar (no difference or a 2-fold difference). Discrepancies  
129 occurred for amikacin for which mucin increased the MIC by 4-fold, and colistin where mucin  
130 conditions resulted in an 8-fold higher MIC. This might be a result of association between the  
131 negatively charged mucin and these polycationic antibiotics. Conversely, against tetracycline  
132 mucin actually increased susceptibility by 4-fold. Overall these data suggested that the observed  
133 resistance (Fig 1, 2) was likely due to adaptation accompanying surfing motility rather than the  
134 presence per se of mucin. For this reason, we investigated these adaptive changes in greater  
135 detail.

#### 136 ***Surfing-mediated antibiotic resistance is associated with multiple resistome genes***

137 RNA-Seq data (NCBI GEO Accession: GSE110044) revealed that surfing is an  
138 adaptation that strongly affected gene expression. RNA-Seq was performed on two different

Sun et al

139 regions of surfing colonies namely the thick white edge and blue-green centre compared to  
140 swimming cells grown in SCFM medium without mucin. In total, there were 1,467 genes  
141 dysregulated in the edge and 2,078 genes in the centre, with 816 genes commonly dysregulated  
142 between the two. To examine the possibility that adaptive resistance during surfing motility was  
143 due to the dysregulation of genes that influence resistance, literature searches were conducted.  
144 This revealed 119 genes that when mutated led to increased susceptibility (intrinsic resistance  
145 genes) and 252 genes that when mutated mediated antibiotic resistance; collectively these form  
146 the resistomes for various antibiotics (16–22). Among the resistome genes, 65 were identified,  
147 through RNA-Seq gene expression data from surfing cells, that matched the direction of  
148 dysregulation of expression levels expected if they were to have a potential role in surfing  
149 mediated resistance. Available transposon mutants of these 65 resistome genes were tested for  
150 changes in susceptibility to certain antibiotics.

151 Table 2 shows the resistome genes dysregulated in the edge and/or centre for which  
152 transposon mutant showed a change in susceptibility to at least one of the 5 tested antibiotics  
153 based on an initial disk diffusion assay. Several of these genes showed a change in susceptibility  
154 to more than one antibiotic, possibly illustrating a contribution to broad-spectrum resistance. The  
155 mean zone of inhibition measurements are presented in Table S1. Five of the tested mutants,  
156  $\Delta recG$ ,  $\Delta ddaH$ ,  $\Delta armR$ ,  $\Delta nalC$ , and  $\Delta PA3667$ , were similarly dysregulated in the centre and  
157 edge of a surfing colony, with *recG* and *ddaH* both up-regulated and *armR*, *nalC*, and *PA3667*  
158 down-regulated. Complements of selected resistome mutants showed that this broad-spectrum  
159 effect could be significantly reversed either partially, completely or excessively (Table 3), and  
160 that overexpression of some of these genes also revealed a change in susceptibility to other  
161 antibiotics as shown in Table 3. RT-qPCR data (Table S2) verified the direction of dysregulation

Sun et al

162 shown in the RNA-Seq data for selected resistome genes.

## 163 **Discussion**

164 *P. aeruginosa* is a highly adaptable organism that exhibits diverse lifestyles from  
165 coordinated forms of motility like swarming to community-based sessile structures like biofilms.  
166 Previously we described a new form of *P. aeruginosa* motility known as surfing under artificial  
167 cystic fibrosis-like conditions where the mucin content is high (12). Here we demonstrated that  
168 this novel form of motility is associated with multidrug adaptive resistance and is a complex  
169 adaptation influencing expression of hundreds of genes. Both disk diffusion and antibiotic  
170 incorporation assays revealed that cells undergoing surfing were significantly more resistant to  
171 multiple antibiotics compared to swimming, and the same concentrations of antibiotics that  
172 completely abolished swimming were found to be much less effective against surfing. MIC  
173 assays revealed that the observed phenomenon was dependent on surface growth associated with  
174 surfing adaption and not merely due to the presence of mucin. To explain the mechanisms behind  
175 surfing-mediated resistance, we explored the contribution of resistome genes found to be  
176 dysregulated in surfing through RNA-Seq and transposon mutant screens. In total, 36 resistome  
177 genes we identified as dysregulated under surfing conditions and that exhibited a change in  
178 susceptibility to certain antibiotics when mutated.

179 Swarming is another complex form of motility exhibited by *P. aeruginosa* found to be  
180 involved with major transcriptional changes (11, 23), substantially distinct from the  
181 transcriptional profile of surfing cells. Swarming has also previously been shown to be resistant  
182 to multiple antibiotics including polymyxin B, ciprofloxacin, and gentamicin, and *pvdQ* mutants  
183 influenced swarming-specific resistance (11, 23). Here surfing was also found to be associated  
184 with resistance against these same antibiotics and many others. Among the resistome genes



Sun et al

185 identified in this study to be dysregulated under surfing conditions that showed contributions to  
186 adaptive antibiotic resistance, *pchF* (11, 24), *atpB*, *ccoO1*, and PA4429 (24) were also shown to  
187 be dysregulated under swarming conditions (11, 24). These 4 genes were found to be down-  
188 regulated in the surfing centre compared to swimming cells, and their mutant variants showed an  
189 increase in resistance to norfloxacin, tobramycin, and/or polymyxin B raising the possibility that  
190 there might be some mechanistic overlap in adaptive resistance between swarming and surfing  
191 cells as part of their complex adaptations.

192 Among the 36 resistome genes for which mutants showed a change in susceptibility to  
193 certain antibiotics, there were 5 that showed the same direction of dysregulation (i.e. both down  
194 or up-regulated) in both the centre and edge of a surfing colony. *RecG* and *ddaH* were both up-  
195 regulated in the surfing centre and edge, and their mutants exhibited similar reduced resistance to  
196 tetracycline. The mutant in *recG* (encoding an ATP-dependent DNA helicase) also exhibited  
197 increased susceptibility to polymyxin B, tobramycin, and norfloxacin. Tetracycline and  
198 tobramycin target protein synthesis through the 30S ribosomal subunit while polymyxin B targets  
199 the cell membrane, and norfloxacin targets DNA replication. The broad-spectrum activity  
200 observed by *recG* as a resistome gene against such diverse antibiotics may arise from its  
201 regulatory nature, in that *recG* transcriptionally regulates OxyR-controlled genes in *P. putida*  
202 (25). Genes identified in the RecG regulon of *P. putida* included porins (*oprE*, *oprD*, PP0883)  
203 and thioredoxin reductase (*trxB*) involved in stress coping mechanisms (25).

204 There were 3 genes, *armR*, *nalC*, and PA3667, that were down-regulated in both regions of  
205 the surf colony. NalC is known to negatively regulate the expression of *armR*, and ArmR inhibits  
206 MexR's DNA binding activity (26, 27). MexR negatively regulates expression of the *mexAB-*  
207 *oprM* operon, which encodes for a major efflux pump in *P. aeruginosa*, intrinsically involved in

Sun et al

208 broad-spectrum antibiotic resistance (26). ArmR allosterically binds to MexR to alleviate its  
209 repression on the *mexAB-oprM* operon (26). Interestingly, Starr et al. (2012) revealed that a  
210 knock-out mutant of *armR* still exhibited increased expression levels of the *mexAB-oprM* operon  
211 under certain conditions (27). Here we showed that mutants in *armR* and *nalC*, which are both  
212 down-regulated in surfing, exhibited similar increases in resistance to tobramycin, norfloxacin,  
213 and polymyxin B. The observed increases in resistance to these antibiotics might be attributed in  
214 part to increased expression levels of the *mexAB-oprM* operon.

215 There were 11 genes dysregulated at the edge and 20 genes at the centre of a surfing colony  
216 that exhibited a change in susceptibility to at least one of the tested antibiotics when mutated  
217 compared to the wild-type. PA5130 was a conserved hypothetical protein found to be up-  
218 regulated in the surfing edge and exhibited an increased susceptibility to all 5 of the tested  
219 antibiotics when mutated. The ATP-dependent protease adapter *clpS* which was downregulated  
220 at the edge, exhibited significant increase in resistance to imipenem, polymyxin B, tobramycin,  
221 and norfloxacin. ClpS has been previously shown by our lab to contribute to antibiotic resistance,  
222 biofilm formation, and swarming motility (28). More specifically, a transposon mutant variant of  
223 *clpS* was observed to have increased resistance to  $\beta$ -lactams through the increased expression of  
224 of  $\beta$ -lactamase (28). Here it was shown that *clpS* also has an effect on resistance against  
225 imipenem, polymyxin B, tobramycin, and norfloxacin under surfing conditions.

226 RNA-Seq data on cells collected from the centre of a surf colony revealed 10 genes, *ccoOI*,  
227 *atpB*, *nuoB*, PA4429, *eftA*, *serA*, *ccmF*, *thiG*, *nuoF*, and *pckA*, involved in metabolism and  
228 energy production, that were down-regulated and for which mutants exhibited increased  
229 resistance to certain antibiotics. Three of these genes, *ccoOI*, *atpB*, and PA4429, have also been  
230 shown to be dysregulated under swarming conditions as discussed previously (11, 24). Mutants

Sun et al

231 for these 10 metabolic genes that were down-regulated at the centre of surfing colonies showed  
232 an increased resistance to norfloxacin and/or tobramycin. Aminoglycosides are taken up by  
233 energy dependent mechanisms (29), and reduced metabolic activities have previously been  
234 shown in *P. aeruginosa* biofilms to contribute to resistance to tobramycin (30). Although  
235 norfloxacin has been shown to affect animal metabolism through interactions with cytochrome  
236 P450 (31), it has not been shown to affect metabolism in *P. aeruginosa*. Here we have  
237 demonstrated that reduced expression levels of certain metabolic resistome genes in the surf  
238 centre may contribute to adaptive resistance against tobramycin and/or norfloxacin.

239 Surfing motility is a novel form of motility that results in a lifestyle adaptation growing  
240 under conditions with high mucin. Here we demonstrate how surfing cells exhibited increased  
241 resistance attributed to large transcriptomic changes as a result of the adaptation.

## 242 **Methods and Materials**

### 243 *Bacterial Strains and Complements*

244 All screens and assays were done using the *Pseudomonas aeruginosa* UCBPP-PA14 (32) wild-  
245 type strain. All mutants used were derivatives of this strain and obtained from the PA14  
246 Transposon Insertion Mutant Library (33). Complemented mutants were generated as follows.  
247 PCR primers listed in Table S3 were used to amplify the desired genes from strain PA14  
248 genomic DNA. The amplified products were cloned into a TOPO vector using the Zero Blunt  
249 TOPO PCR Cloning Kit (Invitrogen). TOPO vectors containing amplified product were digested  
250 using two different enzymes, which differed depending on the gene of interest, and ligated into a  
251 pUCP18 vector containing the *lac* promoter. Vectors containing the desired genes were then  
252 transformed into their respective mutants.

### 253 *Disk diffusion assay*

Sun et al

254 Disk diffusion assays were performed on synthetic cystic fibrosis media (SCFM) (34) prepared  
255 as described by Palmer et al (2007) without ammonia with 0.3% agar and 0.4% (wt/vol) mucin  
256 (surfing conditions), or with 0.3% agar without mucin (swimming conditions), or with 1.5% agar  
257 without mucin (disk diffusion control/growth control). Bacterial strains were grown in Luria  
258 broth (LB; Difco) liquid medium overnight then sub-cultured to mid-log phase ( $OD_{600}=0.4-0.5$ ).  
259 To assay motility, mid-log cultures were spotted on agar surfaces at four points around an  
260 antibiotic disk (Fig S1) impregnated with 10 $\mu$ L of antibiotic at concentrations indicated in Table  
261 S4. Agar plates were air-dried at 37°C for 30 min before inoculation and application of antibiotic  
262 disks. Once inoculated, plates were incubated at 37°C for 15-18 hours. The zone of inhibition  
263 surrounding the antibiotic disk was measured in millimeters using a ruler. In the case of  
264 asymmetric zones of inhibition, the average of the four sides was taken. Disk diffusion controls  
265 or growth controls were spread as lawns on plates and antibiotic disks were applied to the centre.  
266 Data collected under surfing and swimming conditions was normalized to the growth control and  
267 2-way ANOVA was used to determine if any significant difference existed between surfing and  
268 swimming conditions. All statistical analysis was done using Graphpad Prism 7.

#### 269 ***Antibiotic Incorporation Assay***

270 Incorporation assays were done on SCFM (34) using 0.3% agar with 0.4% mucin (surfing  
271 conditions) and 0.3% agar without mucin (swimming). Antibiotics were added into the agar  
272 before solidification. Once hardened, plates were air-dried for 30 minutes at 37°C before being  
273 inoculated with 1  $\mu$ L of a sub-culture at an  $OD_{600}=0.4-0.5$ . Plates were incubated at 37°C for 15-  
274 18 hours. Spot inoculation involved stabbing bacteria midway into the agar. The percentage of  
275 area growth on the plates was measured using ImageJ. Two-way ANOVA was used to determine  
276 if significant differences occurred between the two conditions (surfing and swimming) and

Sun et al

277 between concentrations for surfing.

### 278 *Liquid Minimal Inhibitory Concentration (MIC)*

279 Liquid MICs were conducted as described by Wiegand et al. (2008) (20). This assay was  
280 performed in liquid SCFM (34) with and without 0.4% mucin. An inoculum of 2 to 7 x10<sup>5</sup> cells  
281 was used. Significant differences between MICs were taken as a 3-fold or greater change.

### 282 *RNA-Seq*

283 PA14 was grown in liquid LB medium overnight and sub-cultured to an OD<sub>600</sub>=0.4-0.5. Mid-log  
284 phase cultures were used to inoculate SCFM (34) surfing and swimming plates, prepared as  
285 described above. Surfing plates were air-dried for 30 minutes before inoculation with 1 µL of  
286 culture and incubation at 37°C for 15-18 hours. Using sterile swabs, cells from the centre and  
287 edge of a surfing colony and centre of a swimming colony were collected into RNA protect  
288 bacteria reagent (Qiagen). RNA extraction was conducted using a RNeasy Mini Kit (Qiagen)  
289 according to the manufacturer's protocol. Deoxyribonuclease treatment was performed using a  
290 TURBO DNA-free kit (Thermo Fisher) and rRNA depletion was performed using a RiboZero  
291 Bacteria Kit (Illumina). Single end cDNA libraries were constructed using a Kapa stranded Total  
292 RNA Kit (Kapa Biosystems) and libraries were sequenced on an Illumina HiSeq 2500 in rapid  
293 run mode with 100 bp reads that were base-called and de-multiplexed using built-in software on  
294 the sequencer. Fastq file quality control was performed using FastQC v0.11.5  
295 (<http://www.bioinformatics.babraham.ac.uk/projects/fastqc/>) and MulitQC v0.8.dev0 (35). Fastq  
296 files were aligned to the UCBPP-PA14 genome (GenBank gene annotations) using bowtie-2  
297 (36). Bam-sam file conversion and sorting were performed with samtools (37). Read count tables  
298 were generated with htseq-count v2.5 (38). Differential expression analysis was performed using  
299 DESeq2 (39). Fold-changes in surfing were calculated relative to swimming. Gene annotations

Sun et al

300 were taken from the *Pseudomonas* Genome Database (40).

### 301 ***RT-qPCR***

302 RNA was collected as described for RNA-Seq. Reaction samples were prepared using the  
303 qScript one-step SYBR green RT-qPCR Kit (QuantaBio) with 5ng of RNA per 25 $\mu$ L reaction  
304 amplified in a Roche LightCycler 96. Quantification analysis was done using the comparative Ct  
305 method (41) using *rpoD* as the normalizing gene. All primers used for RT-qPCR are listed in  
306 Table S3.

### 307 **Acknowledgements**

308 Research reported in this publication was supported by a Foundation grant from the  
309 Canadian Institutes for Health Research FDN-154287 and a grant from Cystic Fibrosis (CF)  
310 Canada, Award Number 2585. The content is solely the responsibility of the authors and does  
311 not necessarily represent the official views of the Canadian Institutes for Health Research.  
312 REWH holds a Canada Research Chair in Health and Genomics and a UBC Killam  
313 Professorship.

314 ES performed antibiotic screens, resistome screens, generation of complements, and  
315 manuscript writing. EEG analyzed and processed RNA-Seq data. RF prepared RNA samples for  
316 RNA-Seq. EEG and RF also contributed to manuscript writing. NL contributed to the generation  
317 of complemented strains and performed liquid MICs. Conceptualization, acquisition of funding,  
318 discussion of results and extensive editing and review of the manuscript was performed by  
319 REWH.

### 320 **References**

Sun et al

- 321 1. Bassetti M, Merelli M, Temperoni C, Astilean A. 2013. New antibiotics for bad bugs: where  
322 are we? *Ann Clin Microbiol Antimicrob* 12:22.
- 323 2. Ventola CL. 2015. The antibiotic resistance crisis. *Pharm Ther* 40:277–283.
- 324 3. Biggest Threats | Antibiotic/Antimicrobial Resistance | CDC.
- 325 4. WHO | Antimicrobial resistance: global report on surveillance 2014. WHO.
- 326 5. Garau J, Nicolau DP, Wullt B, Bassetti M. 2014. Antibiotic stewardship challenges in the  
327 management of community-acquired infections for prevention of escalating antibiotic  
328 resistance. *J Glob Antimicrob Resist* 2:245–253.
- 329 6. Bennett JV. 1974. Nosocomial infections due to *Pseudomonas*. *J Infect Dis* 130:S4–S7.
- 330 7. van Ewijk BE, Wolfs TFW, Fleer A, Kimpen JLL, van der Ent CK. 2006. High  
331 *Pseudomonas aeruginosa* acquisition rate in CF. *Thorax* 61:641–642.
- 332 8. Taylor PK, Yeung ATY, Hancock REW. 2014. Antibiotic resistance in *Pseudomonas*  
333 *aeruginosa* biofilms: Towards the development of novel anti-biofilm therapies. *J*  
334 *Biotechnol* 191:121–130.
- 335 9. Breidenstein EBM, de la Fuente-Núñez C, Hancock REW. 2011. *Pseudomonas aeruginosa*:  
336 all roads lead to resistance. *Trends Microbiol* 19:419–426.
- 337 10. Sousa AM, Pereira MO. 2014. *Pseudomonas aeruginosa* diversification during infection  
338 development in cystic fibrosis lungs—a review. *Pathogens* 3:680–703.
- 339 11. Overhage J, Bains M, Brazas MD, Hancock REW. 2008. Swarming of *Pseudomonas*  
340 *aeruginosa* is a complex adaptation leading to increased production of virulence factors and  
341 antibiotic resistance. *J Bacteriol* 190:2671–2679.

Sun et al

- 342 12. Yeung ATY, Parayno A, Hancock REW. 2012. Mucin promotes rapid surface motility in  
343 *Pseudomonas aeruginosa*. mBio 3:e00073-12.
- 344 13. Jain R, Kazmierczak BI. 2014. A conservative amino acid mutation in the master regulator  
345 FleQ renders *Pseudomonas aeruginosa* aflagellate. PLOS ONE 9:e97439.
- 346 14. Harshey RM. 2003. Bacterial motility on a surface: many ways to a common goal. Annu Rev  
347 Microbiol 57:249–273.
- 348 15. Murray TS, Kazmierczak BI. 2008. *Pseudomonas aeruginosa* exhibits sliding motility in the  
349 absence of type IV pili and flagella. J Bacteriol 190:2700–2708.
- 350 16. Breidenstein EBM, Khaira BK, Wiegand I, Overhage J, Hancock REW. 2008. Complex  
351 ciprofloxacin resistome revealed by screening a *Pseudomonas aeruginosa* mutant library  
352 for altered susceptibility. Antimicrob Agents Chemother 52:4486–4491.
- 353 17. Fernández L, Gooderham WJ, Bains M, McPhee JB, Wiegand I, Hancock REW. 2010.  
354 Adaptive resistance to the “last hope” antibiotics polymyxin B and colistin in *Pseudomonas*  
355 *aeruginosa* is mediated by the novel two-component regulatory system ParR-ParS.  
356 Antimicrob Agents Chemother 54:3372–3382.
- 357 18. Alvarez-Ortega C, Wiegand I, Olivares J, Hancock REW, Martínez JL. 2010. Genetic  
358 determinants involved in the susceptibility of *Pseudomonas aeruginosa* to beta-lactam  
359 antibiotics. Antimicrob Agents Chemother 54:4159–4167.
- 360 19. Schurek KN, Marr AK, Taylor PK, Wiegand I, Semenec L, Khaira BK, Hancock REW.  
361 2008. Novel genetic determinants of low-level aminoglycoside resistance in *Pseudomonas*  
362 *aeruginosa*. Antimicrob Agents Chemother 52:4213–4219.



Sun et al

- 363 20. Wiegand I, Marr AK, Breidenstein EBM, Schurek KN, Taylor P, Hancock REW. 2008.  
364 Mutator genes giving rise to decreased antibiotic susceptibility in *Pseudomonas*  
365 *aeruginosa*. *Antimicrob Agents Chemother* 52:3810–3813.
- 366 21. Dötsch A, Becker T, Pommerenke C, Magnowska Z, Jänsch L, Häussler S. 2009.  
367 Genomewide identification of genetic determinants of antimicrobial drug resistance in  
368 *Pseudomonas aeruginosa*. *Antimicrob Agents Chemother* 53:2522–2531.
- 369 22. Gallagher LA, Shendure J, Manoil C. 2011. Genome-scale identification of resistance  
370 functions in *Pseudomonas aeruginosa* using Tn-seq. *mBio* 2:e00315-10.
- 371 23. Wang L, Zhang C, Gong F, Li H, Xie X, Xia C, Chen J, Song Y, Shen A, Song J. 2013.  
372 Influence of *Pseudomonas aeruginosa pvdQ* gene on altering antibiotic susceptibility under  
373 swarming conditions. *Curr Microbiol* 66:152–161.
- 374 24. Tremblay J, Déziel E. 2010. Gene expression in *Pseudomonas aeruginosa* swarming  
375 motility. *BMC Genomics* 11:587.
- 376 25. Yeom J, Lee Y, Park W. 2012. ATP-dependent RecG helicase is required for the  
377 transcriptional regulator OxyR function in *Pseudomonas* species. *J Biol Chem* 287:24492–  
378 24504.
- 379 26. Wilke MS, Heller M, Creagh AL, Haynes CA, McIntosh LP, Poole K, Strynadka NCJ. 2008.  
380 The crystal structure of MexR from *Pseudomonas aeruginosa* in complex with its  
381 antirepressor ArmR. *Proc Natl Acad Sci U S A* 105:14832–14837.
- 382 27. Starr LM, Fruci M, Poole K. 2012. Pentachlorophenol induction of the *Pseudomonas*  
383 *aeruginosa mexAB-oprM* efflux operon: involvement of repressors NalC and MexR and the  
384 antirepressor ArmR. *PLOS ONE* 7:e32684.

Sun et al

- 385 28. Fernández L, Breidenstein EBM, Song D, Hancock REW. 2012. Role of intracellular  
386 proteases in the antibiotic resistance, motility, and biofilm formation of *Pseudomonas*  
387 *aeruginosa*. *Antimicrob Agents Chemother* 56:1128–1132.
- 388 29. Bryan LE, Kwan S. 1983. Roles of ribosomal binding, membrane potential, and electron  
389 transport in bacterial uptake of streptomycin and gentamicin. *Antimicrob Agents*  
390 *Chemother* 23:835–845.
- 391 30. Walters SM, Dubey VS, Jeffrey NR, Dixon DR. 2010. Antibiotic-induced *Porphyromonas*  
392 *gingivalis* LPS release and inhibition of LPS-stimulated cytokines by antimicrobial  
393 peptides. *Peptides* 31:1649–1653.
- 394 31. McLellan RA, Drobitch RK, Monshouwer M, Renton KW. 1996. Fluoroquinolone  
395 antibiotics inhibit cytochrome P450-mediated microsomal drug metabolism in rat and  
396 human. *Drug Metab Dispos Biol Fate Chem* 24:1134–8.
- 397 32. Rahme LG, Stevens EJ, Wolfort SF, Shao J, Tompkins RG, Ausubel FM. 1995. Common  
398 virulence factors for bacterial pathogenicity in plants and animals. *Science* 268:1899–1902.
- 399 33. Liberati NT, Urbach JM, Miyata S, Lee DG, Drenkard E, Wu G, Villanueva J, Wei T,  
400 Ausubel FM. 2006. An ordered, nonredundant library of *Pseudomonas aeruginosa* strain  
401 PA14 transposon insertion mutants. *Proc Natl Acad Sci U S A* 103:2833–2838.
- 402 34. Palmer KL, Aye LM, Whiteley M. 2007. Nutritional cues control *Pseudomonas aeruginosa*  
403 multicellular behavior in cystic fibrosis sputum. *J Bacteriol* 189:8079–8087.
- 404 35. Ewels P, Magnusson M, Lundin S, Käller M. 2016. MultiQC: summarize analysis results for  
405 multiple tools and samples in a single report. *Bioinforma Oxf Engl* 32:3047–3048.
- 406 36. Langmead B, Salzberg SL. 2012. Fast gapped-read alignment with Bowtie 2. *Nat Methods*  
407 9:357–359.

Sun et al

- 408 37. Li H, Handsaker B, Wysoker A, Fennell T, Ruan J, Homer N, Marth G, Abecasis G, Durbin  
409 R, 1000 Genome Project Data Processing Subgroup. 2009. The Sequence Alignment/Map  
410 format and SAMtools. *Bioinforma Oxf Engl* 25:2078–2079.
- 411 38. Anders S, Pyl PT, Huber W. 2015. HTSeq--a Python framework to work with high-  
412 throughput sequencing data. *Bioinforma Oxf Engl* 31:166–169.
- 413 39. Love MI, Huber W, Anders S. 2014. Moderated estimation of fold change and dispersion for  
414 RNA-seq data with DESeq2. *Genome Biol* 15:550.
- 415 40. Winsor GL, Griffiths EJ, Lo R, Dhillon BK, Shay JA, Brinkman FSL. 2016. Enhanced  
416 annotations and features for comparing thousands of *Pseudomonas* genomes in the  
417 *Pseudomonas* genome database. *Nucleic Acids Res* 44:D646–D653.
- 418 41. Schmittgen TD, Livak KJ. 2008. Analyzing real-time PCR data by the comparative C(T)  
419 method. *Nat Protoc* 3:1101–1108.
- 420

Sun et al

421 **Figure Legends and Tables**

422 **Fig 1. Multi-drug adaptive resistance of surfing colonies.** Fold change of the zone of  
423 inhibition under swimming (0.3% agar) and surfing (0.3% agar 0.4% mucin) conditions relative  
424 to a disk diffusion control (lawn plated on 1.5% agar without mucin) in MSCFM which is set as  
425 1 as indicated by the dashed line. Statistical significance between swimming and surfing as  
426 determined using two-way ANOVA. (n=3). \*  $p < 0.5$ , \*\*  $p < 0.01$ , \*\*\*  $p < 10^{-3}$ , \*\*\*\*  $p < 10^{-4}$ .

427  
428 **Fig 2. Concentration dependent inhibition of surfing motility.** Surfing motility colonies of  
429 wild-type PA14 when the antibiotic at varying concentrations was incorporated into 25 mL of  
430 BM2 glucose agar containing 0.4% mucin (surfing) or no mucin (swimming). Incorporation  
431 assay results are described as the % plate coverage, relative to the control with no antibiotics,  
432 measured using Image J. Surfing colonies are represented by the blue bars and swimming by the  
433 red bars. Significance analysis between surfing and swimming was done using two-way  
434 ANOVA. \*  $p < 0.5$ , \*\*  $p < 0.01$ , \*\*\*  $p < 10^{-3}$ , \*\*\*\*  $p < 10^{-4}$

435  
436 **Table 1. Influence of mucin on MIC.** Liquid MIC results done in SCFM with 0.4% mucin and  
437 without mucin grown at 37°C overnight with an inoculum size of  $2-7 \times 10^5$  cells (n=3-5).

|              | MIC ( $\mu$ M) |         |
|--------------|----------------|---------|
|              | + mucin        | - mucin |
| Gentamicin   | 4              | 1       |
| Tobramycin   | 2              | 2       |
| Amikacin     | 16             | 4       |
| Imipenem     | 0.325          | 0.625   |
| Meropenem    | 0.125          | 0.125   |
| Ceftazidime  | 31.25          | 31.25   |
| Aztreonam    | 4              | 8       |
| Piperacillin | 4              | 4       |
| Erythromycin | 500            | 250     |

Sun et al

|                 |      |      |
|-----------------|------|------|
| Clarithromycin  | 2000 | 2000 |
| Polymyxin B     | 16   | 16   |
| Colistin        | 16   | 2    |
| Norfloxacin     | 16   | 16   |
| Ciprofloxacin   | 1    | 0.5  |
| Trimethoprim    | 128  | 128  |
| Tetracycline    | 64   | 256  |
| Chloramphenicol | 32   | 16   |

438

439 **Table 2. Resistome genes and their corresponding changes in antibiotic susceptibility**

440 **relative to wild-type when mutated.** This included 8 resistome genes similarly regulated in

441 both the centre and edge. A further 10 resistome genes dysregulated only at the edge of a surfing

442 colony were affected in such a way as to influence resistance or susceptibility. Twenty resistome

443 genes, dysregulated only in the centre of a surfing colony, were affected in such a way as to

444 influence antibiotic resistance or susceptibility.

| Gene        | Gene Function (40)                            | RNA-Seq Fold Change |      | Antibiotic Susceptibility of Mutant Relative to WT                                           |
|-------------|-----------------------------------------------|---------------------|------|----------------------------------------------------------------------------------------------|
|             |                                               | Centre              | Edge |                                                                                              |
| <i>recG</i> | ATP-dependent DNA helicase                    | 1.9                 | 2.1  | TET <sup>S</sup> , PXB <sup>S</sup> , TOB <sup>S</sup> , NFX <sup>S</sup>                    |
| <i>ddaH</i> | Dimethylarginine dimethylaminohydrolase       | 4.9                 | 3.4  | IMI <sup>S</sup> , TET <sup>S</sup>                                                          |
| <i>armR</i> | Anti-repressor for MexR                       | -3.2                | -5.1 | IMI <sup>R</sup> , TET <sup>R</sup> , PXB <sup>R</sup> , TOB <sup>R</sup> , NFX <sup>R</sup> |
| <i>nalC</i> | Transcriptional regulator                     | -5.3                | -2.7 | PXB <sup>R</sup> , TOB <sup>R</sup> , NFX <sup>R</sup>                                       |
| PA3667      | Probable pyridoxal-phosphate dependent enzyme | -1.7                | -2.5 | TET <sup>R</sup>                                                                             |
| PA5130      | Conserved hypothetical protein                | NC                  | 2.4  | IMI <sup>S</sup> , TET <sup>S</sup> , PXB <sup>S</sup> , TOB <sup>S</sup> , NFX <sup>S</sup> |
| <i>cycH</i> | Cytochrome c-type biogenesis protein          | NC                  | 2.2  | PXB <sup>S</sup> , TOB <sup>S</sup>                                                          |
| <i>clpS</i> | ATP-dependent Clp protease adaptor protein    | NC                  | -2.3 | IMI <sup>R</sup> , PXB <sup>R</sup> , TOB <sup>R</sup> , NFX <sup>R</sup>                    |
| PA3576      | Hypothetical protein                          | NC                  | -2.9 | TET <sup>R</sup> , TOB <sup>R</sup> , NFX <sup>R</sup>                                       |
| PA2047      | Probable transcriptional regulator            | NC                  | -2.0 | TOB <sup>R</sup> , NFX <sup>R</sup>                                                          |
| PA4781      | Cyclic di-GMP phosphodiesterase               | NC                  | -2.9 | TOB <sup>R</sup> , NFX <sup>R</sup>                                                          |
| PA1513      | Hypothetical protein                          | NC                  | -3.0 | TET <sup>R</sup>                                                                             |
| PA2566      | Conserved hypothetical protein                | NC                  | -5.0 | NFX <sup>R</sup>                                                                             |
| PA1348      | Hypothetical protein                          | NC                  | -3.4 | IMI <sup>R</sup> , NFX <sup>R</sup>                                                          |
| PA2571      | Probable two-component sensor                 | NC                  | -2.7 | TOB <sup>R</sup>                                                                             |
| PA4766      | Conserved hypothetical protein                | NC                  | -2.3 | TOB <sup>R</sup>                                                                             |
| PA3233      | Hypothetical protein                          | 2.5                 | NC   | NOR <sup>S</sup>                                                                             |

Sun et al

|              |                                                       |       |    |                                                                           |
|--------------|-------------------------------------------------------|-------|----|---------------------------------------------------------------------------|
| PA4292       | Probable phosphate transporter                        | -6.7  | NC | IMI <sup>R</sup> , PXB <sup>R</sup> , TOB <sup>R</sup> , NFX <sup>R</sup> |
| PA1428       | Conserved hypothetical protein                        | -3.4  | NC | TOB <sup>R</sup> , NFX <sup>R</sup>                                       |
| <i>ccoO1</i> | Cytochrome c oxidase, <i>cbb3</i> -type, CcoO subunit | -3.5  | NC | TOB <sup>R</sup> , NFX <sup>R</sup>                                       |
| <i>atpB</i>  | ATP synthase A chain                                  | -2.1  | NC | TOB <sup>R</sup> , NFX <sup>R</sup>                                       |
| <i>nuoB</i>  | NADH dehydrogenase I chain B                          | -2.8  | NC | IMI <sup>R</sup> , PXB <sup>R</sup> , TOB <sup>R</sup> , NFX <sup>R</sup> |
| PA4429       | Probable cytochrome c1 precursor                      | -2.3  | NC | PXB <sup>R</sup> , TOB <sup>R</sup> , NFX <sup>R</sup>                    |
| <i>etfA</i>  | Electron transfer flavoprotein alpha-subunit          | -6.2  | NC | PXB <sup>R</sup> , TOB <sup>R</sup> , NFX <sup>R</sup>                    |
| <i>serA</i>  | D-3-phosphoglycerate dehydrogenase                    | -12.4 | NC | PXB <sup>R</sup> , TOB <sup>R</sup> , NFX <sup>R</sup>                    |
| <i>ccmF</i>  | Cytochrome C-type biogenesis protein                  | -2.2  | NC | PXB <sup>R</sup> , TOB <sup>R</sup> , NFX <sup>R</sup>                    |
| <i>nuoG</i>  | NADH dehydrogenase I chain G                          | -2.1  | NC | TOB <sup>R</sup> , NFX <sup>R</sup>                                       |
| <i>pchF</i>  | Pyochelin synthetase                                  | -2.2  | NC | TOB <sup>R</sup>                                                          |
| <i>rph</i>   | Ribonuclease PH                                       | -2.3  | NC | TOB <sup>R</sup>                                                          |
| <i>gidA</i>  | Glucose-inhibited division protein A                  | -2.2  | NC | NFX <sup>R</sup>                                                          |
| <i>mutS</i>  | DNA mismatch repair protein                           | -2.5  | NC | PXB <sup>R</sup> , TOB <sup>R</sup>                                       |
| <i>thiG</i>  | Thiamine biosynthesis protein, thiazole moiety        | -2.9  | NC | IMI <sup>R</sup> , NFX <sup>R</sup>                                       |
| <i>nuoF</i>  | NADH dehydrogenase I chain F                          | -2.4  | NC | TOB <sup>R</sup>                                                          |
| <i>pckA</i>  | Phosphoenolpyruvate carboxykinase                     | -2.6  | NC | TOB <sup>R</sup>                                                          |
| <i>braB</i>  | Branched chain amino acid transporter                 | -4.2  | NC | NFX <sup>R</sup>                                                          |
| <i>htpX</i>  | Heat shock protein                                    | -2.0  | NC | NFX <sup>R</sup>                                                          |

445  
 446 **Table 3. Complementation of selected resistome mutants that showed broad spectrum**  
 447 **changes in susceptibility led to restoration of antibiotic susceptibility.** Results show the zone  
 448 of inhibition (n=3) of each mutant and its complemented equivalent against five antibiotics cf.  
 449 wild-type (n=6). Mutants of up-regulated resistome genes were tested against 10ug/disk of  
 450 antibiotic and down-regulated against 100ug/disk. Standard deviations ranged between 0 and  
 451 2.5mm. Statistical significance relative to wild-type was determined using two-way ANOVA. \*  
 452 p<0.5, \*\* p<0.01, \*\*\* p< 10<sup>-3</sup>, \*\*\*\* p<10<sup>-4</sup>

| Strain                                     | Zone of Inhibition (mm) |              |             |            |             |
|--------------------------------------------|-------------------------|--------------|-------------|------------|-------------|
|                                            | Imipenem                | Tetracycline | Polymyxin B | Tobramycin | Norfloracin |
| <b>10 µg/disk antibiotic concentration</b> |                         |              |             |            |             |
| Wild-type                                  | 5.7                     | 5.0          | 5.6         | 3.3        | 1.0         |
| $\Delta recG$                              | 7.3                     | 8.7*         | 9.7**       | 12.5****   | 7.3****     |
| $\Delta recG/recG^+$                       | 6.0                     | 5.7          | 3.7         | 6.7*       | 3.0         |

Sun et al

|                                             |          |           |           |          |          |
|---------------------------------------------|----------|-----------|-----------|----------|----------|
| <i>ΔddaH</i>                                | 9.0**    | 0***      | 5.3       | 3.0      | 2.3      |
| <i>ΔddaH/ddaH<sup>+</sup></i>               | 6.3      | 3.3       | 5.7       | 6.3      | 2.0      |
| <b>100 μg/disk antibiotic concentration</b> |          |           |           |          |          |
| Wild-type                                   | 12.3     | 6.7       | 10.3      | 12.0     | 14.7     |
| <i>ΔPA1428</i>                              | 12.7     | 7.7       | 8.0       | 7.0***   | 0.0***** |
| <i>ΔPA1428/PA1428<sup>+</sup></i>           | 9.0*     | 7.3       | 9.0       | 11.6     | 13.3     |
| <i>ΔPA2047</i>                              | 12.3     | 7.0       | 5.7       | 7.3**    | 9.7***   |
| <i>ΔPA2047/PA2047<sup>+</sup></i>           | 9.7      | 7.0       | 7.3       | 11.3     | 12.0     |
| <i>ΔthiG</i>                                | 6.3***** | 6.7       | 7.0       | 8.7      | 10.3**   |
| <i>ΔthiG/thiG<sup>+</sup></i>               | 9.0*     | 8.7       | 8.3       | 11.0     | 15.0     |
| <i>ΔatpB</i>                                | 9.7      | 4.0       | 8.0       | 8.3*     | 9.7***   |
| <i>ΔatpB/atpB<sup>+</sup></i>               | 10.3     | 7.3       | 8.3       | 12.0     | 14.0     |
| <i>ΔPA3667</i>                              | 15.7     | 0.0*****  | 7.7       | 10.0     | 12.0     |
| <i>ΔPA3667/PA3667<sup>+</sup></i>           | 12.0     | 9.3       | 11.3*     | 11.0     | 9.7***   |
| <i>ΔPA3576</i>                              | 12.0     | 3.0*      | 6.0       | 8.3*     | 10.7*    |
| <i>ΔPA3576/PA3576<sup>+</sup></i>           | 10.7     | 6.3       | 7.3       | 9.0*     | 12.3     |
| <i>ΔPA3721</i>                              | 10       | 2**       | 14.5***** | 0*****   | 10**     |
| <i>ΔPA3721/PA3721<sup>+</sup></i>           | 11.7     | 8.3       | 9.3       | 11.3     | 13.0     |
| <i>ΔclpS</i>                                | 8.3*     | 6.3       | 15*****   | 6.7***   | 8.3***** |
| <i>ΔclpS/clpS<sup>+</sup></i>               | 11.3     | 13.0***** | 11.5      | 11.7     | 12.3     |
| <i>ΔarmR</i>                                | 0*****   | 0*****    | 1.0*****  | 6.3***** | 0*****   |
| <i>ΔarmR/armR<sup>+</sup></i>               | 12.3     | 12.3***** | 10.3      | 12.7     | 15.0     |

453

454

## Figures

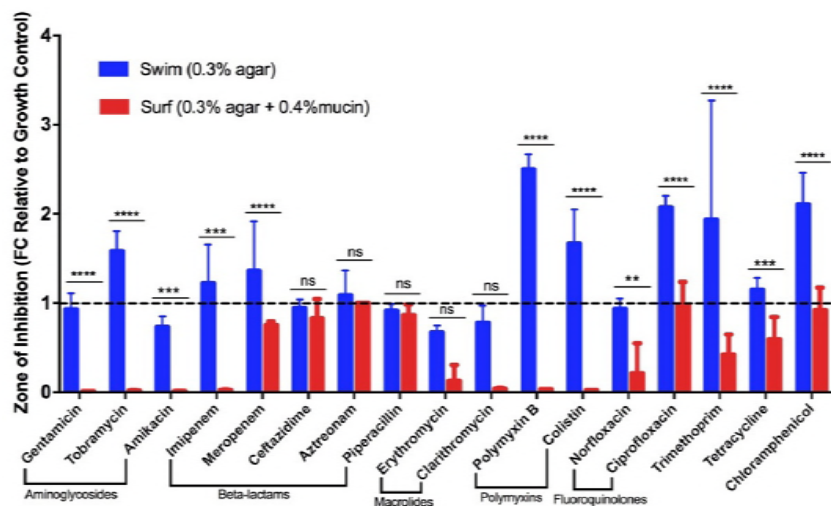

**Fig 1. Multi-drug adaptive resistance of surfing colonies.** Fold change of the zone of inhibition under swimming (0.3% agar) and surfing (0.3% agar 0.4% mucin) conditions relative to a disk diffusion control (lawn plated on 1.5% agar without mucin) in MSCFM which is set as 1 as indicated by the dashed line. Statistical significance between swimming and surfing as determined using two-way ANOVA. (n=3). \* p<0.05, \*\* p<0.01, \*\*\* p< 10<sup>-3</sup>, \*\*\*\* p<10<sup>-4</sup>.



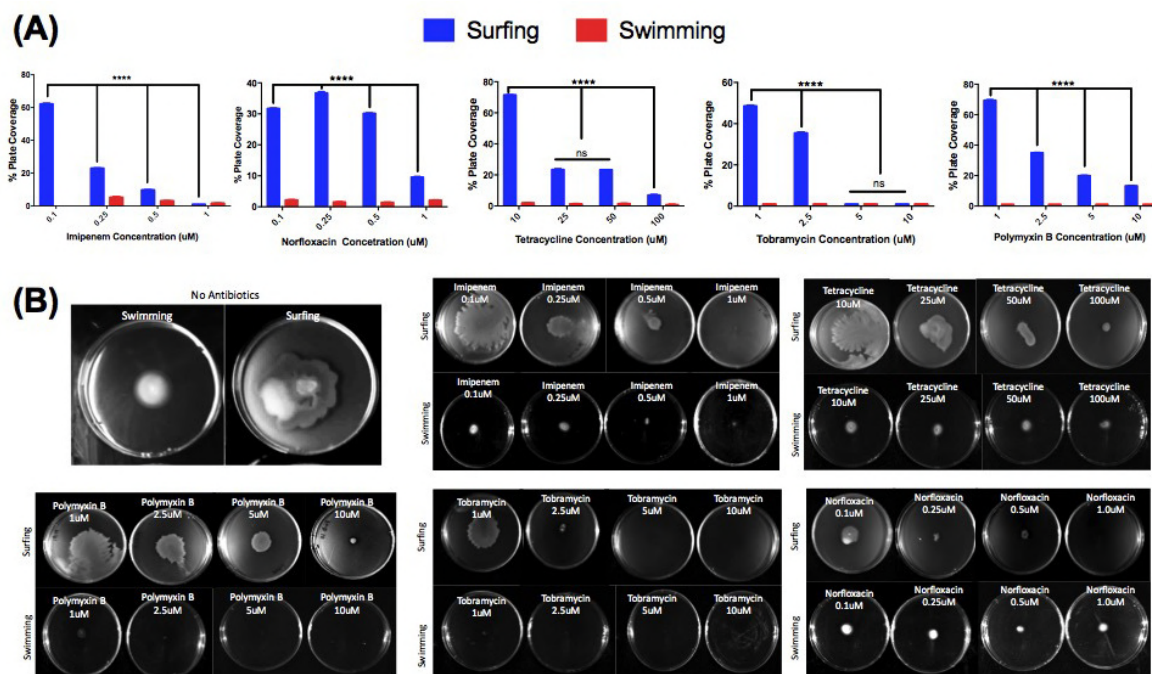

**Fig 2. Concentration dependent inhibition of surfing motility.** Surfing motility colonies of wild-type PA14 when the antibiotic at varying concentrations was incorporated into 25 mL of BM2 glucose agar containing 0.4% mucin (surfing) or no mucin (swimming). Incorporation assay results are described as the % plate coverage, relative to the control with no antibiotics, measured using Image J. Surfing colonies are represented by the blue bars and swimming by the red bars. Significance analysis between surfing and swimming was done using two-way ANOVA. \*  $p < 0.05$ , \*\*  $p < 0.01$ , \*\*\*  $p < 10^{-3}$ , \*\*\*\*  $p < 10^{-4}$
